# Supplementary material for: Characterization of interactions of dietary cholesterol with the murine and human gut microbiome
Source: PubMed Central journal article supplement (PMC9417993; doi:10.1038/s41564-022-01195-9), 2022-08-18
Supplement: 41564_2022_1195_MOESM1_ESM.pdf [file 41564_2022_1195_MOESM1_ESM.pdf]

---

**Supplementary information**

---

**Characterization of interactions of dietary cholesterol with the murine and human gut microbiome**

---

In the format provided by the authors and unedited

## **Supplementary Information**

### **Characterization of interactions of dietary cholesterol with the murine and human gut microbiome**

Henry H. Le<sup>1\*</sup>, Min-Ting Lee<sup>1\*</sup>, Kevin Besler<sup>1</sup>, Janine Comrie<sup>1</sup>, Elizabeth L. Johnson<sup>1,2</sup>

<sup>1</sup>Division of Nutritional Sciences, Cornell University, Ithaca, NY 14853, USA

<sup>2</sup>Correspondence to: [elj54@cornell.edu](mailto:elj54@cornell.edu)

\*These authors contributed equally to this work

## Supplemental Tables

### Supplementary Table 1 - Primers

| Name/Use           | Sequence                                                                |
|--------------------|-------------------------------------------------------------------------|
| pET28_BT0416_fwd   | gtgccgcgcgccagccatagGGATTACTTGAATTTAATAAACTTCCGATTAATACGTTG             |
| pET28_BT0416_rev   | gttatgctagtattgctcagcTTATAAATTATAGTTCCATTGTTTCAAAGCAAAATCCC             |
| pET28_BT0468_fwd   | ggtgccgcgcgccagccatagATAAAAAATAAAAAAATCAGAGGATTGTTGTGGATGTTC            |
| pET28_BT0468_rev   | ctagtattgctcagcTTATTGGAGTTTTCTTAATACTCTTTTAATAATTTGTTTCACTA             |
| pET28_BT0487_fwd   | gcccctggtgccgcgcgccagccatagAATAAATTGCCGAAAGAATCAGAATCAAAG               |
| pET28_BT0487_rev   | ggttatgctagtattgctcagcTTATTTGCTATGGTAATAGTCTATTGTTTCTACAGTC             |
| pET28_BT0969_fwd   | gcctggtgccgcgcgccagccatagAATAATCTTCGAATCTTATTATACGTGGTTGTCC             |
| pET28_BT0969_rev   | cccaaggggttatgctagtattgctcagcCTACAATGATTTGATGTAGTCTTCCAGTG              |
| pET28_BT1511_fwd   | ggtgccgcgcgccagccatagAAAATAAGAAATTTATTAGTAGCCATACTTGC AATGAG            |
| pET28_BT1511_rev   | aaggggttatgctagtattgctcagcTCATTCTGCTATACAGATACAAACACGATT TTC            |
| pET28_BT1712_fwd   | agcggcctggtgccgcgcgccagccatagAAAAGGTAGATATAATTCATGGTGGATGG              |
| pET28_BT1712_rev   | gttatgctagtattgctcagcTCATATAGCGTTCAAATATTAGCATAAGATTCAATCA              |
| pEx_frag1_0416_fwd | CGAGTCGACGGTATCGATAAGCTTGATATCAAGTGGCATCGGGTATTGTCCGCAAGGGAG            |
| frag1_0416_fwd     | AAGTGGCATCGGGTATTGTCCGCAAGGGAGATACAGTGAT                                |
| frag1_0416_rev     | TTTCTTAATCATCAATACTTATCCTTTCTTCGTCTACATTTTATTTAATCACTTTTATG             |
| frag2_0416_fwd     | CATAAAAGTGATTAAATAAAATGTAGAACGAAGAAAGGATAAGTATTGATGATTAAGAAA            |
| frag2_0416_rev     | AAGTCACCAACGTTCCGATACGCTTGGCATAAACATTTCC                                |
| pEx_frag2_0416_rev | GGAATTCCTCCACC CGCGGTGGCGGCCGCAAGTCACCAACGTTCCGATACGCTTGGCAT            |
| qPCR_BT0416_fwd    | CCAGCCTCTGAAACTGGAGG                                                    |
| qPCR_BT0416_rev    | TTCTCCGTCATTCCCATCGC                                                    |
| qPCR_BT0412_fwd    | CCGTTTCCCCGGTATCAACA                                                    |
| qPCR_BT0412_rev    | CGTATCATCCGCCATCACCA                                                    |
| 16s_qPCR_fwd       | GGTAGTCCACACAGTAAACGATGAA                                               |
| 16s_qPCR_rev       | CCCGTCAAATTCCTTTGAGTTTC                                                 |
| 515F               | AATGATACGGCGACCACCGAGATCTACACTATGGTAATTGTGTGCCAGCMGCCGCGGTAA            |
| 806R               | CAAGCAGAAGACGGCATAACGAGATXXXXXXXXXXXXXAGTCAGTCA GCCGGACTACHVGGGTWTCTAAT |

**Supplementary Table 2 - Strain sources**

| Strain                                                       | Source                                    |
|--------------------------------------------------------------|-------------------------------------------|
| <i>A. caccae</i>                                             | DSM 14662                                 |
| <i>B. caccae</i>                                             | ATCC 43185                                |
| <i>B. ovatus</i>                                             | ATCC 8483                                 |
| <i>B. fragilis</i>                                           | ATCC 25285                                |
| <i>B. uniformis</i>                                          | ATCC 8492                                 |
| <i>B. vulgatus</i>                                           | ATCC 8482                                 |
| <i>B. thetaiotaomicron</i>                                   | DSM 2079                                  |
| <i>B. thetaiotaomicron</i> (sphingolipid-deficient)          | Professor Andrew Goodman, Yale University |
| <i>B. thetaiotaomicron</i> VPI-5482 <i>tdk</i>               | Professor Andrew Goodman, Yale University |
| <i>B. thetaiotaomicron</i> VPI-5482 <i>tdk</i> $\Delta$ 0416 | This study                                |
| <i>B. longum</i> subsp. <i>infantis</i>                      | ATCC 15697                                |
| <i>B. pseudolongum</i> subsp. <i>pseudolongum</i>            | ATCC 25526                                |
| <i>E. coli</i> (BL21)                                        | New England Biolabs C2530H                |
| <i>E. coli</i> (TOP10)                                       | Invitrogen C404010                        |
| <i>E. coli</i> (S17-1 $\lambda$ pir)                         | Biomedal                                  |
| <i>E. coprostanoligenes</i>                                  | ATCC 51222                                |
| <i>L. amylovorus</i> Nakamura                                | ATCC 33620                                |
| <i>Ruminococcaceae</i> species                               | ATCC TSD-27                               |
|                                                              |                                           |
| American Type Culture Collection                             | ATCC                                      |
| German Collection of Microorganisms                          | DSM                                       |

All unique plasmids and strains available upon request.

**Supplementary Table 3 – Sort efficiency**

| Replicate | # of Alk+ events collected | # of Alk- events collected | % of parent population <sup>a</sup> in Alk+ gate | % of parent population <sup>a</sup> in Alk- gate | % Sort Efficiency in Alk+ gate | % Sort Efficiency in Alk- gate |
|-----------|----------------------------|----------------------------|--------------------------------------------------|--------------------------------------------------|--------------------------------|--------------------------------|
| Mouse 1   | 1,152,000                  | 1,152,000                  | 36.17%                                           | 63.70%                                           | 95%                            | 94%                            |
| Mouse 2   | 1,152,000                  | 1,152,000                  | 40.38%                                           | 59.42%                                           | 93%                            | 93%                            |
| Mouse 3   | 1,152,000                  | 1,152,000                  | 34.87%                                           | 65.12%                                           | 98%                            | 97%                            |
| exvivo 1  | 1,103,000                  | 1,103,000                  | 37.61%                                           | 62.37%                                           | 95%                            | 96%                            |
| exvivo 2  | 1,152,000                  | 1,152,000                  | 36.12%                                           | 63.27%                                           | 96%                            | 96%                            |
| exvivo 3  | 1,018,000                  | 1,023,010                  | 38.12%                                           | 60.33%                                           | 98%                            | 97%                            |

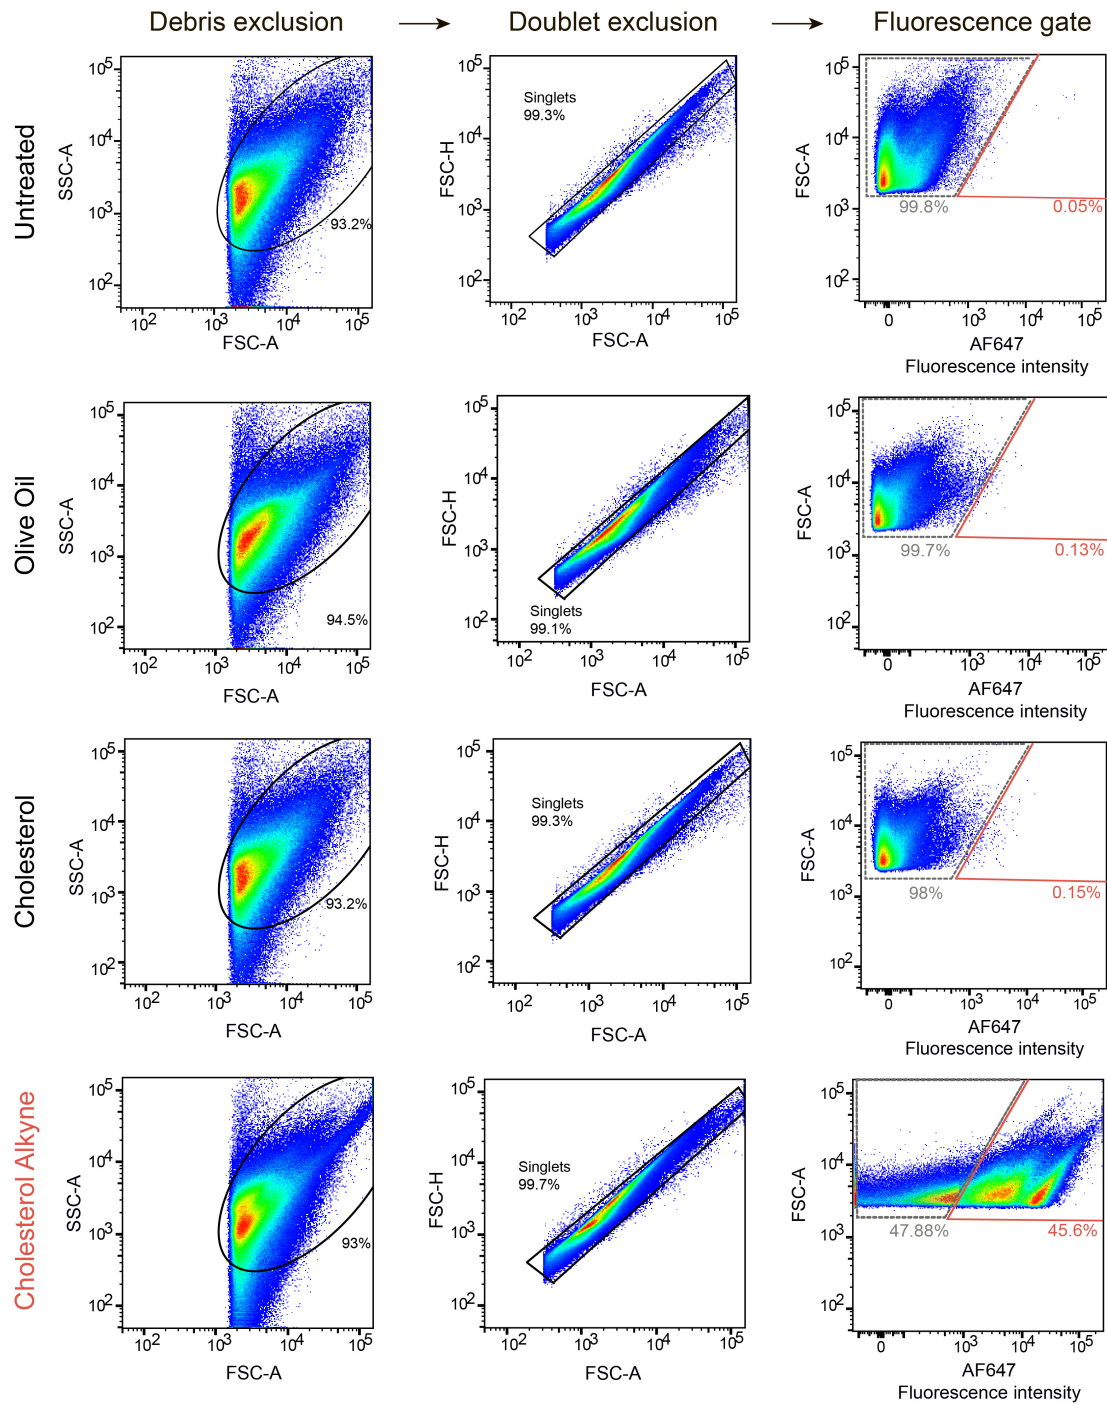

**Supplementary Fig. 1 | Representative density plots from successive FACS gating steps applied to cecal microbial samples from each dietary treatment group.** This gating strategy demonstrates the steps used to isolate Alk+ and Alk- populations. The definition of each step is outlined on the top of the panel, and the treatment group is shown on the left side of each row.

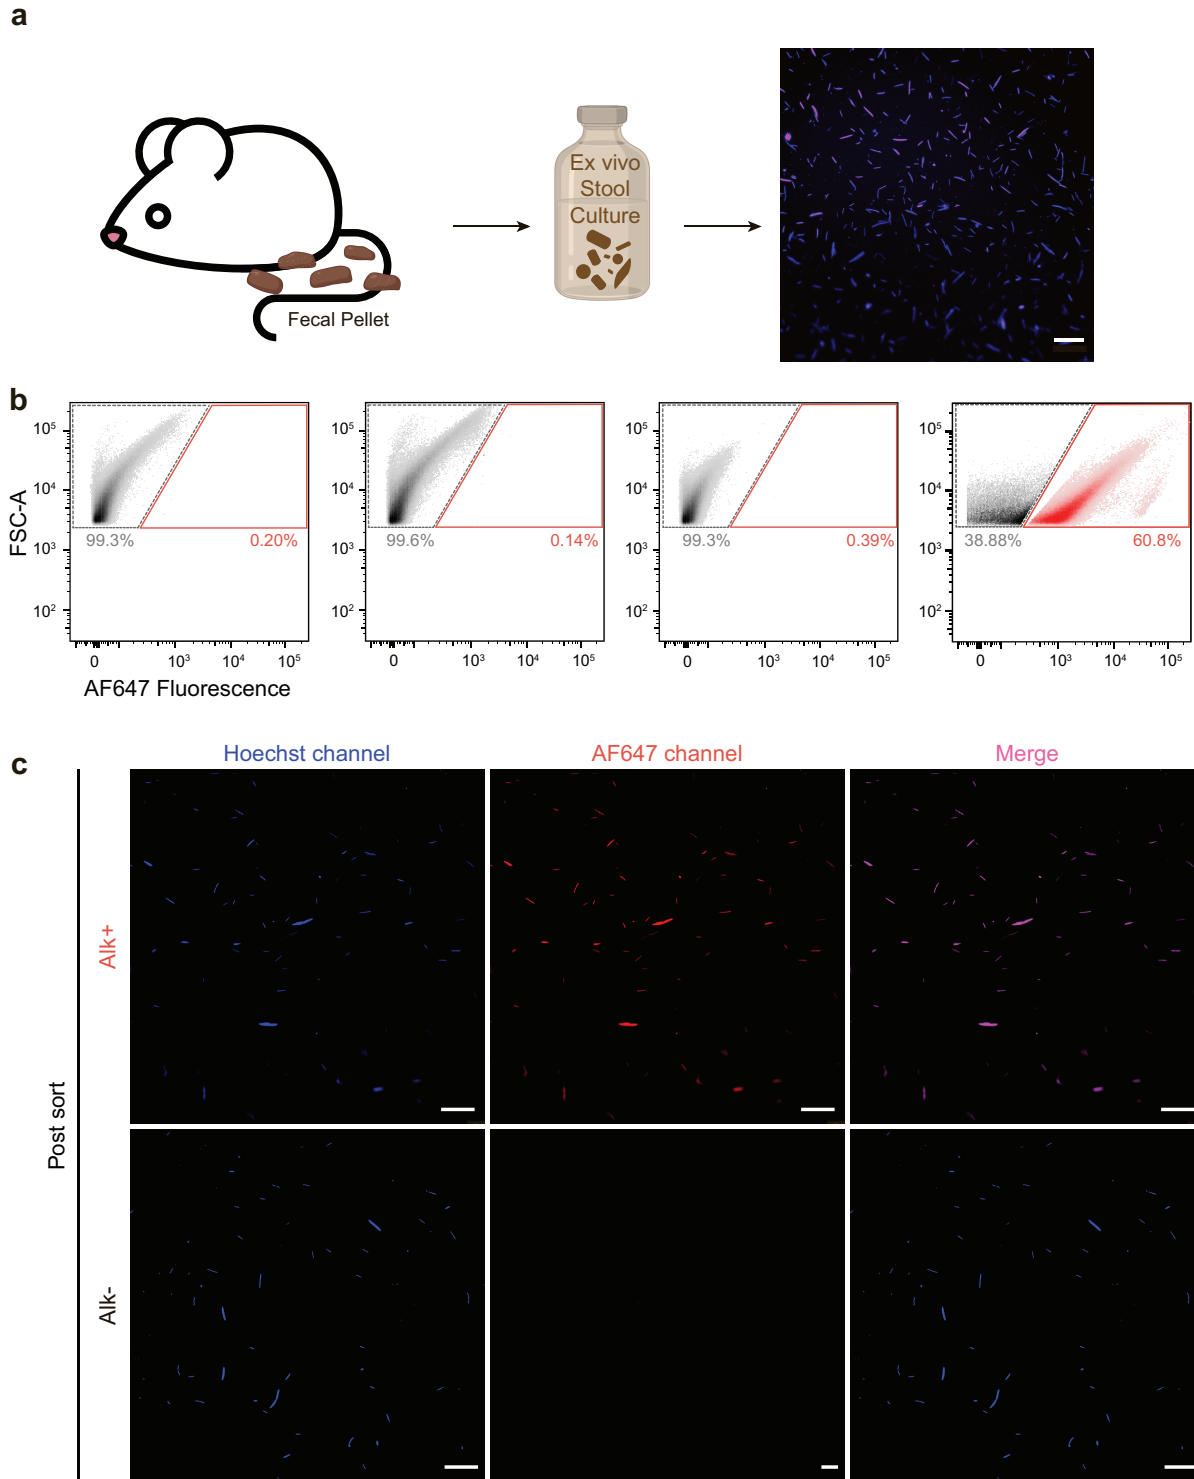

**Supplementary Fig. 2 | FACS enrichment of AF647-azide positive microbes arising from *ex vivo* culturing system.** **a**, Fecal microbes were extracted from murine fecal pellets and cultured with Chol<sup>Alk</sup>. Bacterial uptake was confirmed by fluorescent microscopy and the merged image is shown. Chol<sup>Alk</sup>-interacting microbes are red (AF647-azide) while the nucleic acids stain marks all microbes in blue using Hoechst 33342. (Scale bar: 20  $\mu$ m) **b**, FACS density plots

demonstrating isolation of Chol<sup>Alk</sup>-interacting organisms. **c**, Fluorescence microscopy demonstrating staining of Chol<sup>Alk</sup>-interacting or non-interacting organisms post-FACS. (Scale bar: 20  $\mu$ m).

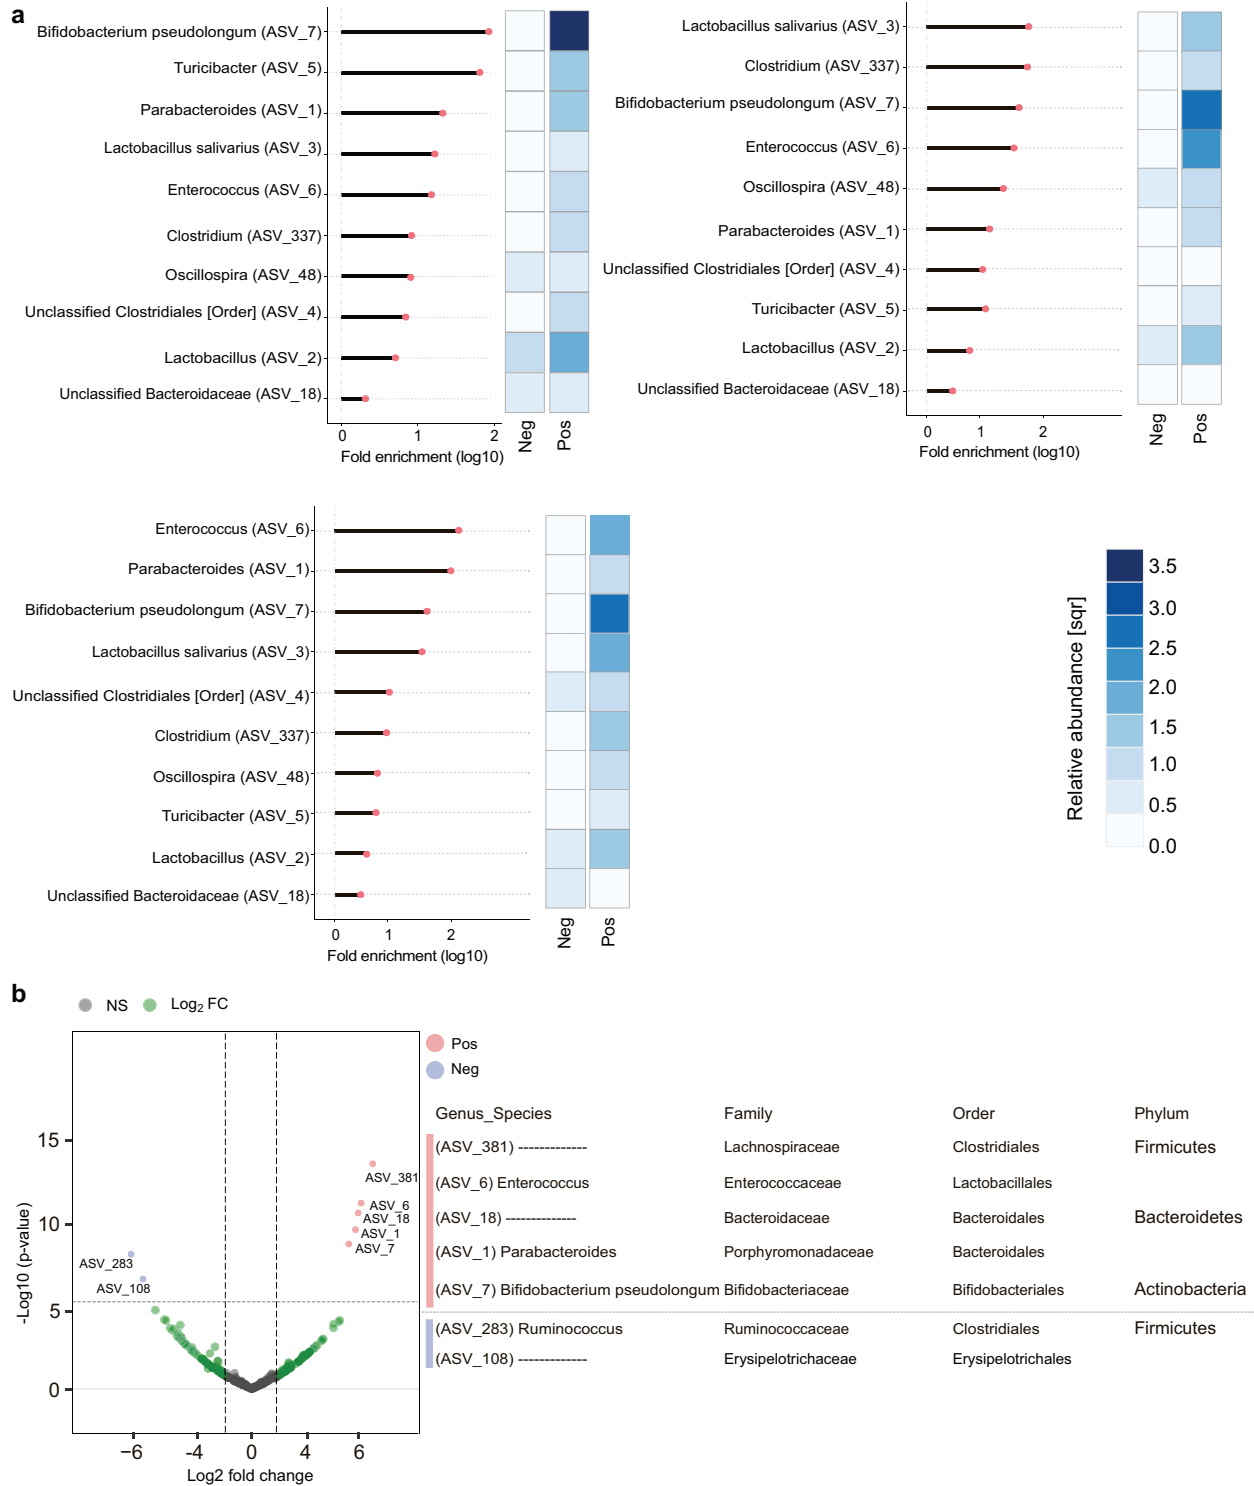

**Supplementary Fig. 3 | BioOrthogonal-labeling Sort-Sequence- (BOSS-) reveals the taxonomic identities of cholesterol-interacting gut microbes.** **a**, Enrichment results from 16S amplicon sequencing determined taxonomic classifications of cholesterol-interacting microbes separated using FACS. Heat maps indicate the magnitude of representation of the listed taxa in the neg (Alk-, cholesterol non-interacting) and pos (Alk+, cholesterol-interacting) sorted fractions. (n = 3 for each sorted population). Red dots indicate the value of the fold enrichment. **b**, Volcano plot showing taxonomic differences between Alk+ and Alk- using DESeq2 analysis. The pink dots represent those ASVs that have a log<sub>2</sub> fold change greater than 2 enriched in Alk+ and are significantly different (Wald test, Benjamin Hochberg correction, adjusted *P* < 0.05) from the Alk- fraction. (n = 3 for each sorted population, Pos: Alk+ and Neg: Alk-).

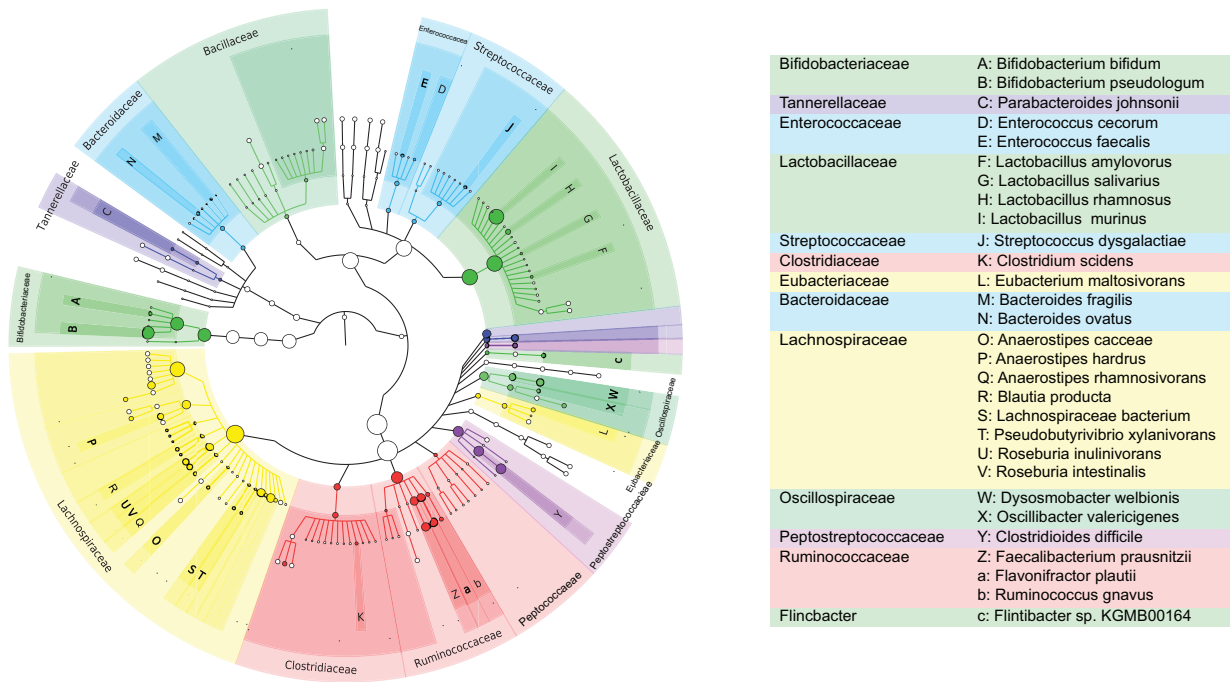

**Supplementary Fig. 4 | Shotgun metagenomic sequencing analysis identifies various taxa enriched in the Alk+ fraction.** Each dot represents a node in the phylogenetic tree, and its size indicates the prevalence of representatives of the corresponding node in the sample. Family-level taxonomic classification is colored for differentiation. The letters represent those microbes identified with relatively high abundance with species-level resolution.



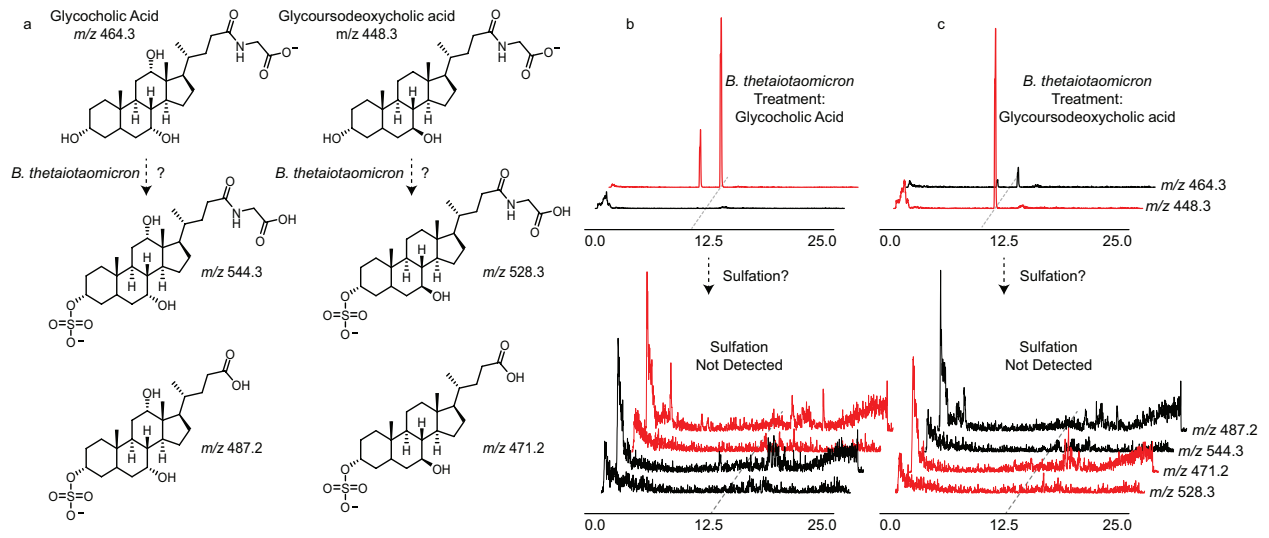

**Supplementary Fig. 5 | Conjugated bile acids are not substrates for sulfotransferase in *B. thetaiotaomicron*.** **a**, Schematic of conjugated bile acids tentatively undergoing conversion to their corresponding sulfates via *B. thetaiotaomicron*. Ion chromatograms demonstrating that **b**, glycocholic acid, and **c**, glycoursodeoxycholic acid, are not converted to their corresponding sulfates by *B. thetaiotaomicron*. Red lines indicate the chromatogram and information corresponding to the denoted bile acid.

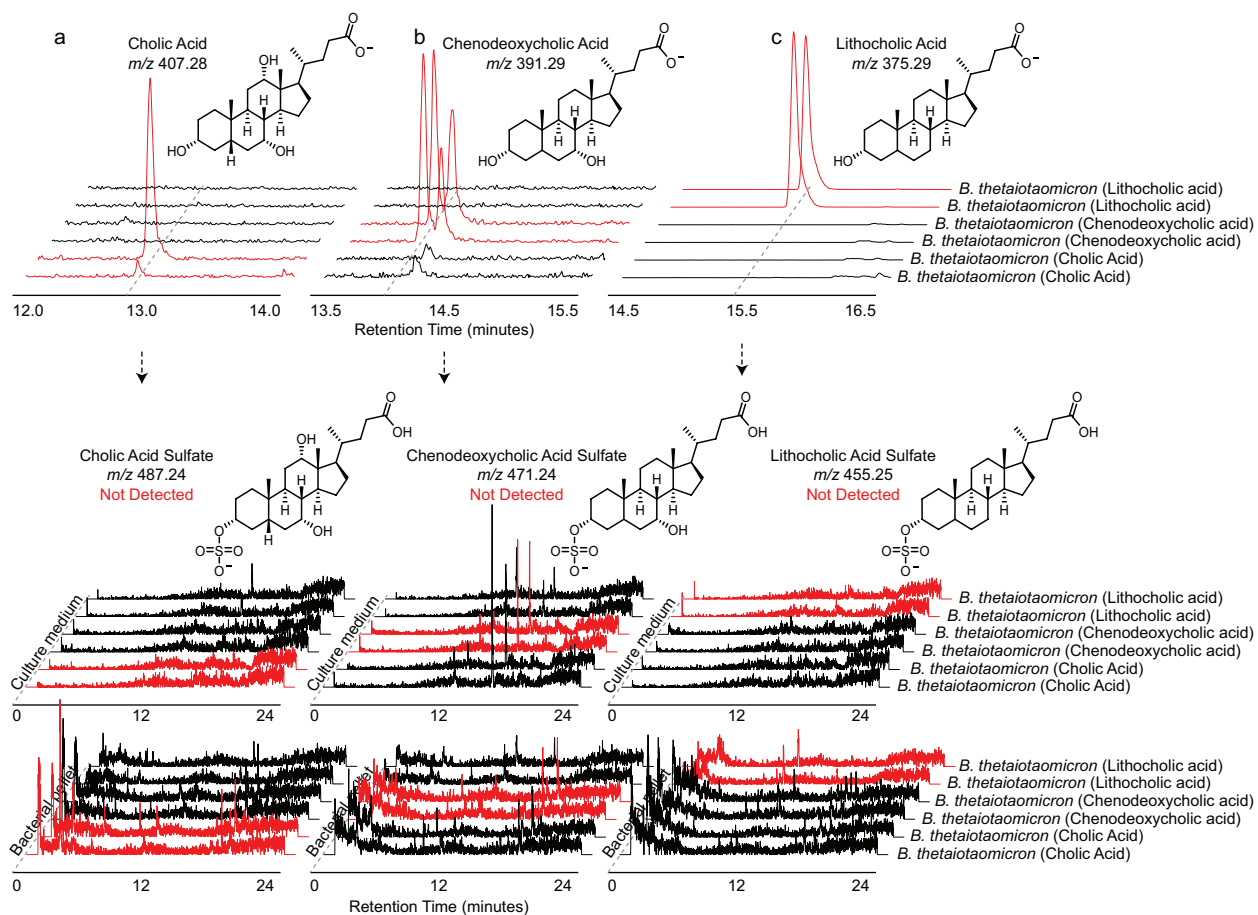

**Supplementary Fig. 6 | Primary and secondary bile acids are not substrates for sulfotransferase in *B. thetaiotaomicron*.** **a**, Cholic acid, **b**, chenodeoxycholic acid, and **c**, lithocholic acid are not converted to their corresponding sulfates by *B. thetaiotaomicron*. Red lines indicate the chromatogram and information corresponding to the denoted bile acid.

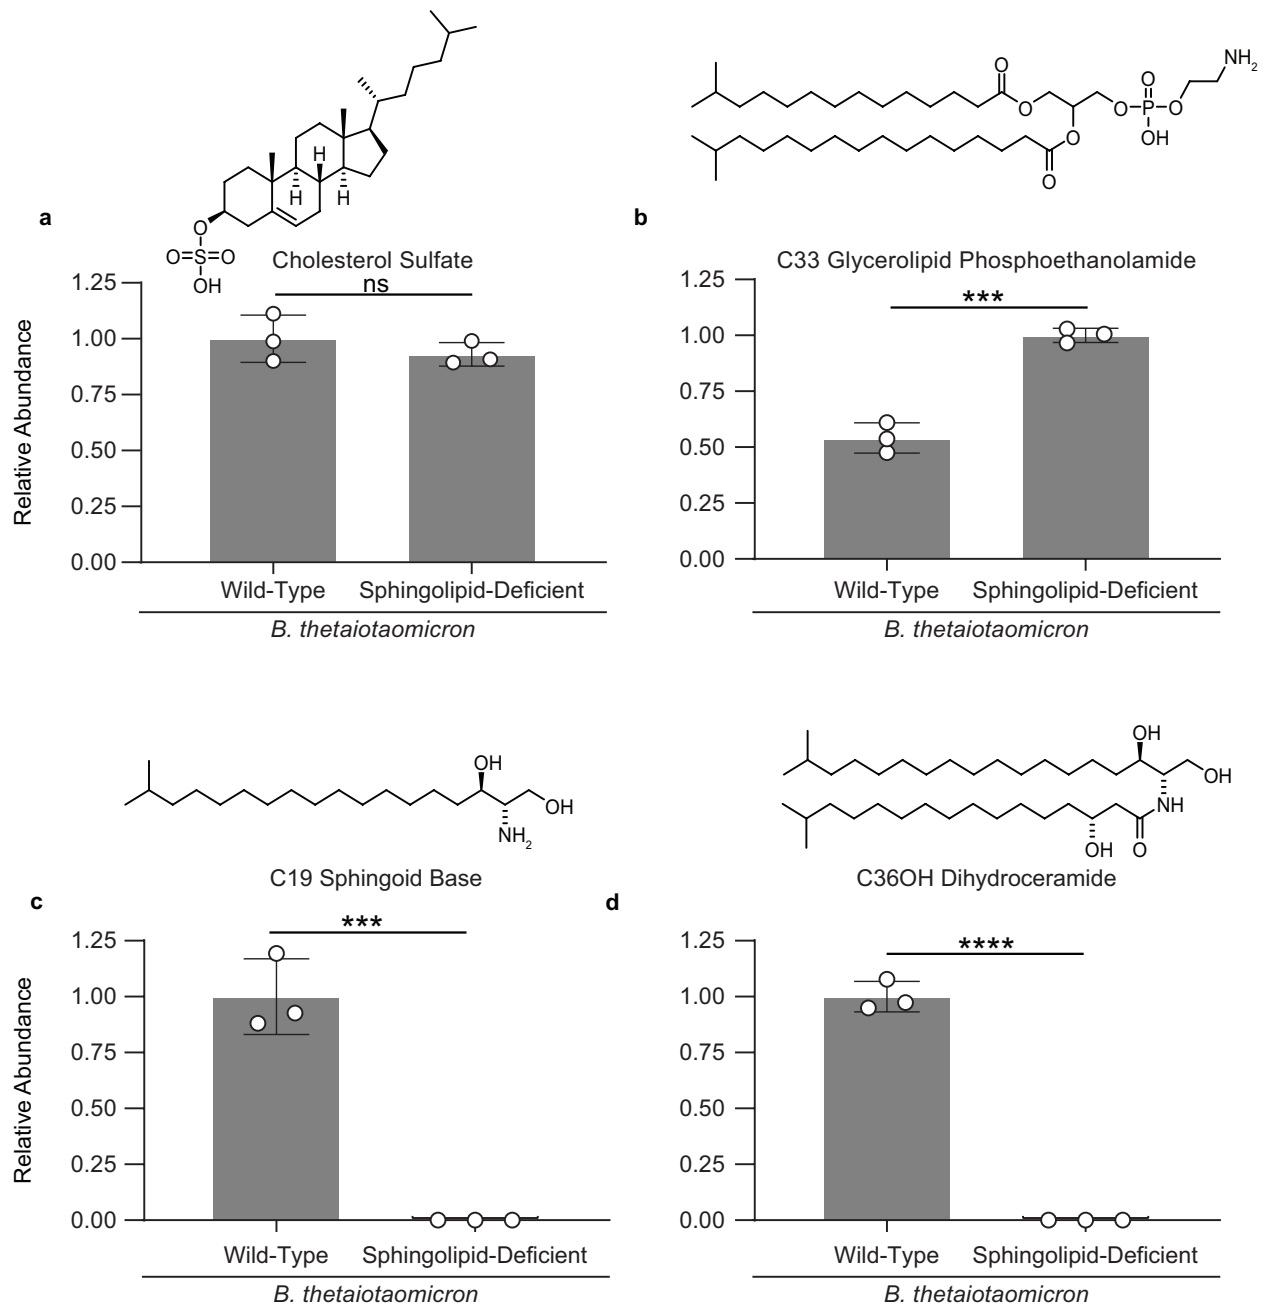

**Supplementary Fig. 7 | Cholesterol sulfate production is independent from sphingolipid production in *Bacteroides thetaiotaomicron*.** Relative quantification of **a**, cholesterol sulfate, **b**, C33 glycerolipid phosphoethanolamide, **c**, C19 sphingoid base, and **d**, C36OH dihydroceramide from either wild-type or sphingolipid-deficient *B. thetaiotaomicron* cultures. Bar chart values are the mean  $\pm$  SD. (n = 3 biologically independent cultures per condition).

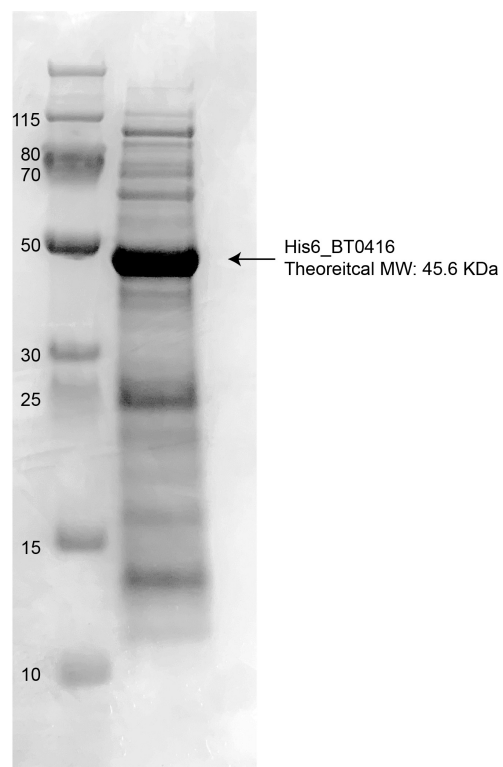

**Supplementary Fig. 8 | Coomassie stained SDS-PAGE of partially isolated His6-BT0416 from expression in BL21 *E. coli*.**

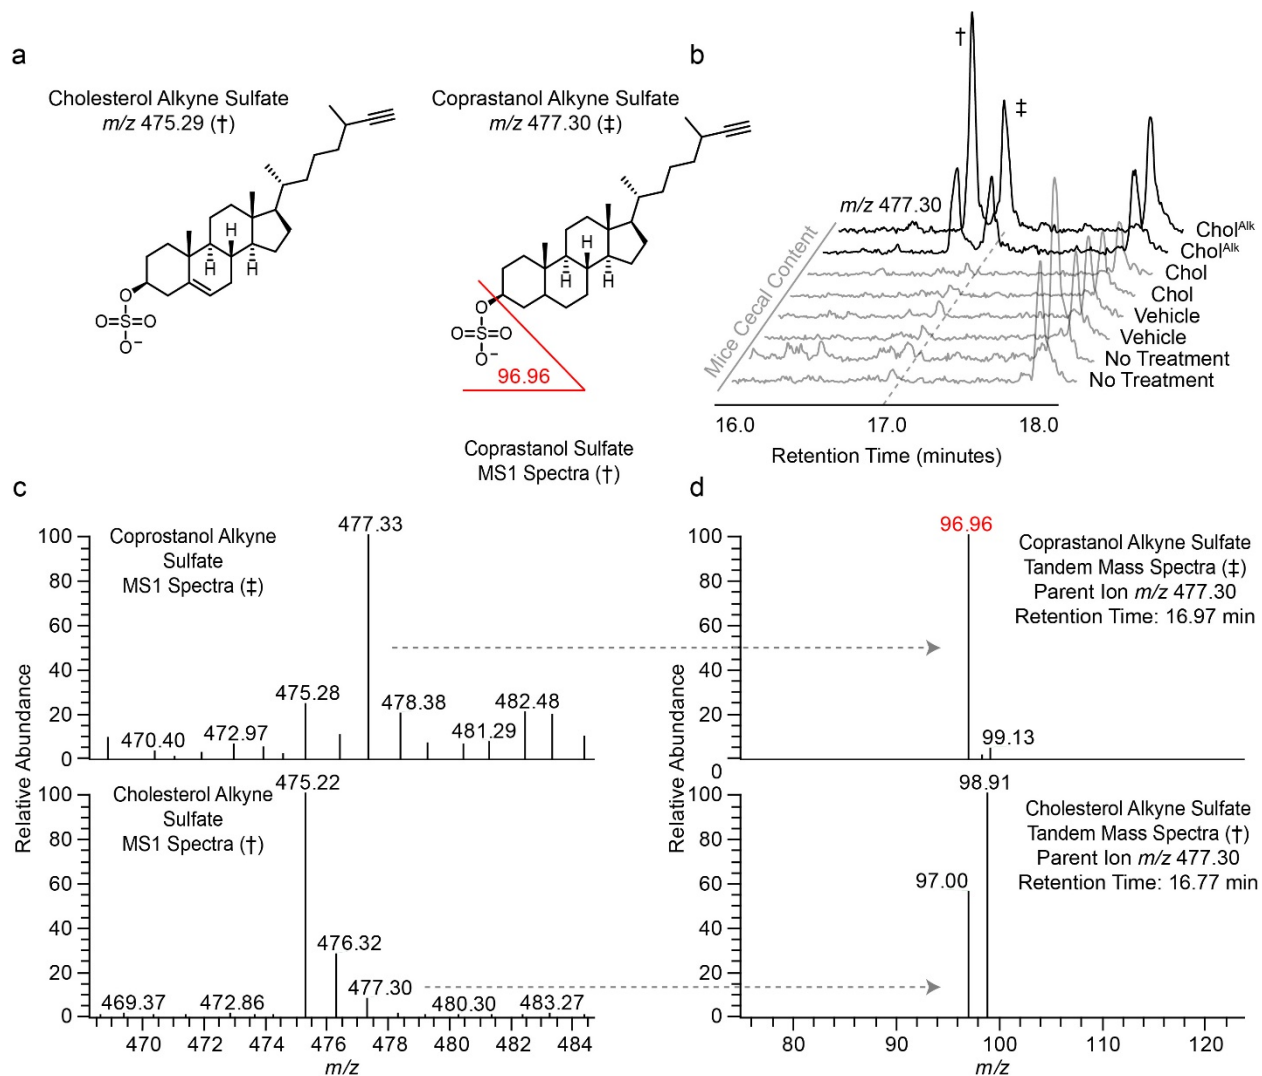

**Supplementary Fig. 9** | **a**, Representative structures, **b**, ion chromatograms, and tandem mass spectra fragmentation patterns of, **c**, coprastanol alkyne sulfate and, **d**, cholesterol alkyne sulfate from cecal content of mice treated with cholesterol alkyne.

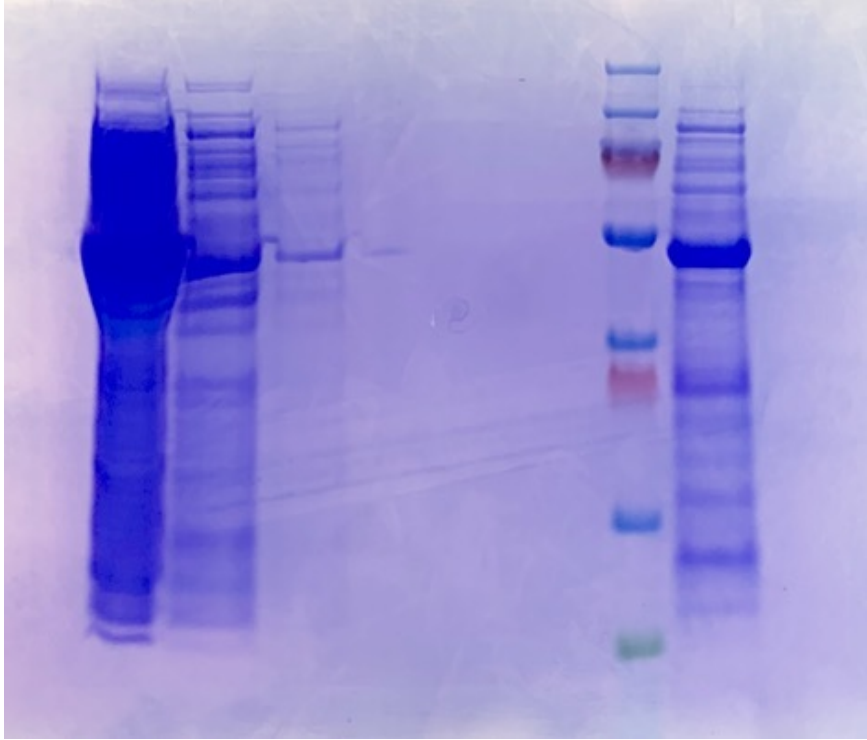

Uncropped blot of Supplementary Figure 8
